# Supplementary material
Source: publisher figshare collection journal article supplement (https://geolsoc.figshare.com/ndownloader/files/5423693)
Supplement: Supplementary file 1 [file 5423693]

Date	Reading	Mode		MgO	MgO+/-	Al2O3	Al2O3+/-	SiO2	SiO2+/-	P2O5	P2O5+/-	S	S +/-	Cl	Cl +/-	K2O	K2O+/-	CaO	CaO+/-	TiO2	TiO2+/-	V	V +/-	Cr	Cr +/-	MnO	MnO+/-	Fe2O3	Fe2O3+/-	Co	Co +/-	Ni	Ni +/-	Cu	Cu +/-	Zn	Zn +/-	As	As +/-	Zr	Zr +/-	Mo	Mo +/-	Ag	Ag +/-	Cd	Cd +/-	Sn	Sn +/-
	USGS AGV-2	GeoRem Recommended		1.79	0.03	16.91	0.21	59.30	0.70	0.48	0.02	-	-	75.00	3.00	2.88	0.11	5.20	0.13	1.05	0.22	122.00	4.00	16.00	1.00	0.10	0.00	6.69	0.13	16.00	1.00	20.00	1.00	53.00	4.00	86.00	8.00	-	-	230.00	4.00	-	-	-	-	-	-	2.30	0.40
AGV-2 Average (n=38)				6.37	1.03	16.26	0.18	64.49	0.12	0.40	0.01	<LOD	0.02	#VALUE!	0.18	2.69	0.01	5.04	0.01	1.38	0.03	0.04	0.00	0.03	0.00	0.10	0.00	7.02	0.02	0.00	0.00	0.01	0.00	0.01	0.00	0.01	0.00	#VALUE!	0.01	#VALUE!	#VALUE!	#VALUE!	0.01	#VALUE!	0.02	#VALUE!	0.03	#VALUE!	0.04
Stdev				1.70	0.21	0.34	0.01	0.95	0.00	0.02	0.00	-	0.00	#VALUE!	0.02	0.03	0.00	0.05	0.00	0.04	0.00	0.00	0.00	0.00	0.00	0.00	0.00	0.07	0.00	0.00	0.00	0.00	0.00	0.00	0.00	0.00	0.00	#VALUE!	0.00	#VALUE!	#VALUE!	#VALUE!	0.00	#VALUE!	0.00	#VALUE!	0.00	#VALUE!	0.00
%RSD				26.76	20.23	2.09	6.47	1.47	4.05	3.79	4.96	-	4.29	#VALUE!	11.48	1.12	3.12	1.03	2.92	2.71	3.25	11.57	9.38	12.67	3.38	3.95	3.55	0.96	3.27	10.58	10.02	18.58	4.49	9.43	4.72	14.23	9.04	#VALUE!	8.37	#VALUE!	#VALUE!	#VALUE!	2.82	#VALUE!	2.90	#VALUE!	2.91	#VALUE!	2.91
%RD				255.74	3339.71	-3.87	-15.58	8.75	-82.42	-17.01	-43.33	-	#VALUE!	#VALUE!	-93.94	-6.51	-94.18	-3.08	-93.90	31.87	-87.24	-99.97	-99.93	-99.79	-99.63	-2.35	-19.16	5.01	-84.93	-99.98	-99.98	-99.96	-99.88	-99.99	-99.99	-99.99	-99.99	#VALUE!	#VALUE!	#VALUE!	#VALUE!	#VALUE!	#VALUE!	#VALUE!	#VALUE!	#VALUE!	#VALUE!	#VALUE!	-91.06
	BAMAP01	Geolabs sheet		8.18	0.02	15.24	0.04	47.91	0.12	0.45	0.01	0.01	0.01	-	-	1.57	0.01	8.33	0.01	2.31	0.01	216.00	7.00	-	-	0.16	0.01	-	-	49.00	1.00	187.00	4.00	57.00	1.00	116.00	2.00	-	-	178.00	3.00	3.00	1.00	-	-	-	-	1.80	0.10
BAMAP01 Average (n=34)				9.37	1.24	16.22	0.18	51.21	0.12	0.44	0.01	<LOD	0.01	#VALUE!	0.14	1.24	0.01	7.94	0.01	2.42	0.03	0.03	0.00	0.05	0.00	0.13	0.00	12.20	0.03	0.00	0.00	0.02	0.00	0.01	0.00	0.01	0.00	#VALUE!	0.01	#VALUE!	#VALUE!	#VALUE!	0.00	#VALUE!	0.02	#VALUE!	0.03	#VALUE!	0.03
Stdev				2.14	0.25	0.40	0.01	0.96	0.00	0.02	0.00	-	0.00	#VALUE!	0.02	0.02	0.00	0.13	0.00	0.05	0.00	0.00	0.00	0.00	0.00	0.00	0.00	0.12	0.00	0.00	0.00	0.00	0.00	0.00	0.00	0.00	0.00	#VALUE!	0.00	#VALUE!	#VALUE!	#VALUE!	0.00	#VALUE!	0.00	#VALUE!	0.00	#VALUE!	0.00
%RSD				22.83	20.47	2.47	3.65	1.88	2.94	4.07	4.38	-	3.70	#VALUE!	11.24	1.54	2.36	1.61	2.26	2.01	2.26	12.88	8.83	9.22	2.56	3.62	2.67	1.02	2.16	7.35	9.68	8.08	5.88	11.72	6.10	11.85	10.21	#VALUE!	8.30	#VALUE!	#VALUE!	#VALUE!	2.06	#VALUE!	1.74	#VALUE!	1.83	#VALUE!	1.85
%RD				14.50	6112.18	6.41	350.39	6.88	-2.10	-1.33	25.70	-	36.91	#VALUE!	#VALUE!	-21.31	-49.70	-4.74	-8.99	4.71	232.22	-99.99	-99.96	#VALUE!	#VALUE!	-16.47	-62.62	#VALUE!	#VALUE!	-99.99	-99.98	-99.99	-99.96	-99.99	-99.94	-99.99	-99.95	#VALUE!	#VALUE!	#VALUE!	#VALUE!	#VALUE!	-99.56	#VALUE!	#VALUE!	#VALUE!	#VALUE!	#VALUE!	-68.14
	BCR-2	GeoRem Recommended		3.59	0.05	13.50	0.20	54.10	0.80	0.35	0.02	160.00	-	98.00	8.00	1.79	0.05	7.12	0.11	2.26	0.05	416.00	14.00	18.00	2.00	0.20	0.01	13.80	0.20	37.00	3.00	18.00	1.00	21.00	1.00	127.00	9.00	-	-	184.00	1.00	250.00	20.00	-	-	-	-	-	-
BCR-2 Average (n=33)				5.64	1.19	13.96	0.18	57.10	0.12	0.27	0.01	<LOD	0.01	#VALUE!	0.14	1.51	0.01	6.49	0.01	2.51	0.03	0.04	0.00	0.02	0.00	0.16	0.00	13.31	0.03	0.00	0.00	#VALUE!	0.01	#VALUE!	0.00	0.02	0.00	#VALUE!	0.01	#VALUE!	#VALUE!	0.01	0.00	#VALUE!	0.02	#VALUE!	0.02	#VALUE!	0.03
Stdev				1.41	0.25	0.32	0.01	0.98	0.00	0.01	0.00	-	0.00	#VALUE!	0.02	0.02	0.00	0.07	0.00	0.05	0.00	0.00	0.00	0.00	0.00	0.00	0.00	0.13	0.00	0.00	0.00	#VALUE!	0.01	#VALUE!	0.00	0.00	0.00	#VALUE!	0.00	#VALUE!	#VALUE!	0.00	0.00	#VALUE!	0.00	#VALUE!	0.00	#VALUE!	0.00
%RSD				25.05	20.85	2.29	5.12	1.72	2.91	4.86	4.30	-	3.75	#VALUE!	11.81	1.22	2.13	1.06	1.95	1.90	2.49	10.50	8.79	15.87	2.20	2.80	2.38	1.00	2.28	8.99	9.91	#VALUE!	104.08	#VALUE!	132.14	12.45	8.89	#VALUE!	8.29	#VALUE!	#VALUE!	2.11	0.00	#VALUE!	1.85	#VALUE!	1.94	#VALUE!	1.88
%RD				57.19	2278.66	3.39	-10.15	5.55	-84.82	-23.26	-42.48	-	#VALUE!	#VALUE!	-98.30	-15.92	-89.39	-8.86	-92.35	11.20	-34.07	-99.99	-99.98	-99.86	-99.82	-17.83	-60.72	-3.58	-86.48	-99.99	-99.99	#VALUE!	-99.40	#VALUE!	-99.83	-99.99	-99.99	#VALUE!	#VALUE!	#VALUE!	#VALUE!	-100.00	-100.00	#VALUE!	#VALUE!	#VALUE!	#VALUE!	#VALUE!	#VALUE!
	BIR-1a	GeoRem Recommended		9.70	0.10	15.40	0.20	47.70	0.40	0.03	0.01	70.00	30.00	26.00	-	0.03	0.00	13.40	0.20	0.97	0.03	319.00	18.00	391.00	15.00	0.18	0.01	11.30	0.12	52.00	3.00	166.00	7.00	119.00	8.00	72.00	18.00	0.44	-	14.00	0.10	0.07	-	0.04	-	0.10	-	0.60	-
BIR-1a (n=37)				8.19	1.16	19.36	0.18	48.82	0.11	#VALUE!	0.05	<LOD	0.02	#VALUE!	0.16	#VALUE!	0.01	12.53	0.01	1.16	0.03	0.03	0.00	0.06	0.00	0.14	0.00	10.90	0.02	0.00	0.00	0.02	0.00	0.01	0.00	#VALUE!	0.01	#VALUE!	0.01	#VALUE!	#VALUE!	#VALUE!	0.00	#VALUE!	0.02	#VALUE!	0.03	#VALUE!	0.03
Stdev				1.51	0.23	0.36	0.01	0.62	0.00	#VALUE!	0.00	-	0.00	#VALUE!	0.02	#VALUE!	0.00	0.27	0.00	0.03	0.00	0.00	0.00	0.00	0.00	0.00	0.00	0.12	0.00	0.00	0.00	0.00	0.00	0.00	0.00	#VALUE!	0.00	#VALUE!	0.00	#VALUE!	#VALUE!	#VALUE!	0.00	#VALUE!	0.00	#VALUE!	0.00	#VALUE!	0.00
%RSD				18.47	19.78	1.84	3.12	1.28	3.66	#VALUE!	6.11	-	4.58	#VALUE!	9.99	#VALUE!	4.22	2.16	3.46	2.71	3.51	10.02	8.98	6.36	3.64	3.44	3.84	1.14	3.57	6.89	10.02	8.92	4.07	6.69	4.79	#VALUE!	8.88	#VALUE!	8.86	#VALUE!	#VALUE!	#VALUE!	3.35	#VALUE!	3.08	#VALUE!	3.11	#VALUE!	3.06
%RD				-15.54	1056.75	25.68	-10.03	2.34	-71.61	#VALUE!	599.63	-	-99.95	#VALUE!	#VALUE!	#VALUE!	394.26	-6.52	-94.67	19.11	-13.13	-99.99	-99.99	-99.99	-99.97	-18.27	-52.48	-3.54	-79.42	-99.99	-99.99	-99.99	-99.98	-99.99	-99.99	#VALUE!	-99.93	#VALUE!	#VALUE!	#VALUE!	#VALUE!	#VALUE!	#VALUE!	#VALUE!	#VALUE!	#VALUE!	#VALUE!	#VALUE!	#VALUE!
Blank Average (n=81)				4.38	1.05	#VALUE!	0.60	88.08	0.15	0.73	0.01	#VALUE!	0.02	#VALUE!	0.24	#VALUE!	0.02	#VALUE!	0.03	0.24	0.02	0.01	0.00	0.03	0.00	#VALUE!	0.01	#VALUE!	0.12	#VALUE!	0.00	#VALUE!	0.00	#VALUE!	0.01	#VALUE!	0.01	#VALUE!	0.01	#VALUE!	#VALUE!	#VALUE!	0.00	#VALUE!	0.03	#VALUE!	0.03	#VALUE!	0.04
STDEV				1.11	0.21	#VALUE!	0.04	1.52	0.01	0.02	0.00	#VALUE!	0.00	#VALUE!	0.03	#VALUE!	0.00	#VALUE!	0.00	0.03	0.00	0.00	0.00	0.00	0.00	#VALUE!	0.03	#VALUE!	0.16	#VALUE!	0.00	#VALUE!	0.00	#VALUE!	0.00	#VALUE!	0.00	#VALUE!	0.00	#VALUE!	#VALUE!	#VALUE!	0.00	#VALUE!	0.00	#VALUE!	0.00	#VALUE!	0.00
%RSD				25.27	19.90	#VALUE!	7.14	1.73	7.05	3.11	5.56	#VALUE!	11.61	#VALUE!	11.44	#VALUE!	5.73	#VALUE!	5.34	10.68	4.28	16.44	10.35	14.91	4.71	#VALUE!	284.89	#VALUE!	129.60	#VALUE!	10.60	#VALUE!	177.57	#VALUE!	6.76	#VALUE!	10.29	#VALUE!	11.12	#VALUE!	#VALUE!	#VALUE!	4.19	#VALUE!	4.17	#VALUE!	4.16	#VALUE!	4.14
	CHA-2	Geolabs sheet		2.46	0.03	17.75	0.09	60.42	0.32	0.22	0.01	<0.01	-	-	-	2.02	0.03	5.88	0.04	0.72	0.01	124.88	4.13	-	-	0.10	0.01	-	-	13.81	0.26	14.11	1.89	21.94	0.49	74.94	2.03	-	-	171.53	2.98	-	-	-	-	-	-	-	-
CHA-2 Average (n=33)				6.92	1.10	18.01	0.18	67.87	0.13	0.17	0.01	<LOD	0.02	#VALUE!	0.21	1.82	0.01	5.92	0.01	0.99	0.03	0.02	0.00	0.03	0.00	0.10	0.00	6.06	0.02	0.00	0.00	#VALUE!	0.00	#VALUE!	0.00	0.01	0.00	#VALUE!	0.01	#VALUE!	#VALUE!	#VALUE!	0.01	#VALUE!	0.03	#VALUE!	0.03	#VALUE!	0.04
Stdev				1.49	0.23	0.45	0.01	1.19	0.00	0.01	0.00	-	0.00	#VALUE!	0.02	0.02	0.00	0.07	0.00	0.03	0.00	0.00	0.00	0.00	0.00	0.00	0.00	0.06	0.00	0.00	0.00	#VALUE!	0.00	#VALUE!	0.00	0.00	0.00	#VALUE!	0.00	#VALUE!	#VALUE!	#VALUE!	0.00	#VALUE!	0.00	#VALUE!	0.00	#VALUE!	0.00
%RSD				21.52	21.01	2.50	5.12	1.75	3.18	7.75	4.51	-	4.51	#VALUE!	11.79	1.30	2.41	1.18	2.54	3.07	2.48	13.15	8.76	14.88	2.74	4.28	3.06	0.91	2.34	9.56	10.68	#VALUE!	172.76	#VALUE!	162.73	16.48	8.89	#VALUE!	8.54	#VALUE!	#VALUE!	#VALUE!	2.09	#VALUE!	2.03	#VALUE!	2.04	#VALUE!	2.02
%RD				181.32	3572.35	1.45	99.66	12.33	-59.20	-24.56	12.71	-	#VALUE!	#VALUE!	#VALUE!	-9.70	-80.23	0.63	-78.56	37.12	164.79	-99.98	-99.94	#VALUE!	#VALUE!	-4.62	-67.24	#VALUE!	#VALUE!	-99.98	-99.94	#VALUE!	-99.89	#VALUE!	-99.71	-99.99	-99.97	#VALUE!	#VALUE!	#VALUE!	#VALUE!	#VALUE!	#VALUE!	#VALUE!	#VALUE!	#VALUE!	#VALUE!	#VALUE!	#VALUE!
	DNC-1a	USGS Sheet		10.13	0.11	18.34	0.17	47.15	0.21	0.07	0.01	-	-	60.00	-	0.23	0.01	11.49	0.07	0.48	0.01	148.00	8.30	270.00	8.50	0.15	0.00	9.97	0.15	57.00	2.20	247.00	12.00	100.00	2.60	70.00	2.40	0.12	-	38.00	1.00	-	-	-	-	-	-	-	-
DNC-1a Average (n=40)				10.46	1.13	19.74	0.18	47.46	0.11	#VALUE!	0.05	#VALUE!	0.02	#VALUE!	0.16	#VALUE!	0.02	10.61	0.01	0.72	0.02	0.02	0.00	0.05	0.00	0.13	0.00	9.87	0.02	0.00	0.00	0.03	0.00	0.01	0.00	#VALUE!	0.01	#VALUE!	0.01	#VALUE!	#VALUE!	#VALUE!	0.00	#VALUE!	0.02	#VALUE!	0.03	#VALUE!	0.03
Stdev				2.11	0.24	0.70	0.01	1.78	0.01	#VALUE!	0.00	#VALUE!	0.00	#VALUE!	0.02	#VALUE!	0.00	0.51	0.00	0.02	0.00	0.00	0.00	0.00	0.00	0.01	0.00	0.34	0.00	0.00	0.00	0.00	0.00	0.00	0.00	#VALUE!	0.00	#VALUE!	0.00	#VALUE!	#VALUE!	#VALUE!	0.00	#VALUE!	0.00	#VALUE!	0.00	#VALUE!	0.00
%RSD				20.17	21.42	3.57	4.61	3.75	5.67	#VALUE!	6.34	#VALUE!	14.78	#VALUE!	11.01	#VALUE!	4.41	4.77	5.78	3.37	4.88	14.39	10.25	7.41	5.32	4.24	4.59	3.41	4.11	9.77	9.82	8.94	3.39	10.73	8.93	#VALUE!	18.10	#VALUE!	8.43	#VALUE!	#VALUE!	#VALUE!	16.20	#VALUE!	4.04	#VALUE!	4.19	#VALUE!	4.38
%RD				3.27	929.71	7.64	4.84	0.66	-47.85	#VALUE!	872.12	#VALUE!	#VALUE!	#VALUE!	#VALUE!	#VALUE!	89.46	-7.64	-86.38	50.40	217.44	-99.98	-99.97	-99.98	-99.96	-16.12	15.93	-0.96	-84.84	-99.99	-99.99	-99.99	-99.99	-99.99	-99.98	#VALUE!	-99.51	#VALUE!	#VALUE!	#VALUE!	#VALUE!	#VALUE!	#VALUE!	#VALUE!	#VALUE!	#VALUE!	#VALUE!	#VALUE!	#VALUE!
	GSP-2	USGS Sheet		0.96	0.03	14.90	0.20	66.60	0.80	0.29	0.02	-	-	-	-	5.38	0.14	2.10	0.06	0.66	0.02	52.00	4.00	20.00	6.00	-	-	4.90	0.16	7.30	0.80	17.00	2.00	43.00	4.00	120.00	10.00	-	-	550.00	30.00	2.10	0.60	-	-	-	-	-	-
GSP-2 Average (n=33)				7.53	1.00	14.90	0.18	71.46	0.13	0.20	0.01	#VALUE!	0.02	#VALUE!	0.20	5.63	0.01	1.75	0.01	1.11	0.03	0.04	0.00	0.06	0.00	0.06	0.00	5.42	0.02	0.00	0.00	0.01	0.00	0.00	0.00	0.02	0.00	#VALUE!	0.01	#VALUE!	#VALUE!	#VALUE!	0.01	#VALUE!	0.03	#VALUE!	0.03	#VALUE!	0.04
Stdev				2.03	0.21	0.34	0.01	1.14	0.00	0.01	0.00	#VALUE!	0.00	#VALUE!	0.02	0.07	0.00	0.03	0.00	0.03	0.00	0.00	0.00	0.00	0.00	0.00	0.00	0.06	0.00	0.00	0.00	0.00	0.00	0.00	0.00	0.00	0.00	#VALUE!	0.00	#VALUE!	#VALUE!	#VALUE!	0.00	#VALUE!	0.00	#VALUE!	0.00	#VALUE!	0.00
%RSD				26.95	20.82	2.27	5.12	1.60	3.06	4.46	4.53	#VALUE!	15.64	#VALUE!	11.42	1.18	2.36	1.74	2.33	2.57	2.56	10.55	8.87	7.71	2.93	7.00	3.30	1.20	2.43	9.54	9.94	16.87	4.55	10.36	4.46	11.30	10.36	#VALUE!	9.09	#VALUE!	#VALUE!	#VALUE!	1.88	#VALUE!	1.94	#VALUE!	2.00	#VALUE!	2.00
%RD				684.18	3248.31	-0.01	-10.15	7.29	-84.01	-30.69	-50.54	#VALUE!	#VALUE!	#VALUE!	#VALUE!	4.59	-93.77	-16.47	-88.83	67.64	37.65	-99.92	-99.93	-99.72	-99.93	#VALUE!	#VALUE!	10.65	-88.94	-99.97	-99.98	-99.95	-99.94	-99.99	-99.99	-99.99	-99.99	#VALUE!	#VALUE!	#VALUE!	#VALUE!	#VALUE!	-98.96	#VALUE!	#VALUE!	#VALUE!	#VALUE!	#VALUE!	#VALUE!
JG-1A	Govindaraju			0.69		14.22		72.19		0.08		10.00				4.01		2.13		0.25						0.06		0.43
JG-1A Average (n=39)				7.66	0.93	14.30	0.17	77.97	0.13	#VALUE!	0.05	#VALUE!	0.02	#VALUE!	0.23	4.16	0.01	1.92	0.01	0.57	0.02	0.02	0.00	0.03	0.00	0.06	0.00	2.21	0.01	0.00	0.00	0.01	0.00	#VALUE!	0.01	#VALUE!	0.01	#VALUE!	0.01	#VALUE!	#VALUE!	#VALUE!	0.01	#VALUE!	0.03	#VALUE!	0.03	#VALUE!	0.04
Stdev				1.68	0.19	0.29	0.01	1.11	0.01	#VALUE!	0.00	#VALUE!	0.00	#VALUE!	0.02	0.04	0.00	0.03	0.00	0.03	0.00	0.00	0.00	0.00	0.00	0.00	0.00	0.03	0.00	0.00	0.00	0.00	0.00	#VALUE!	0.00	#VALUE!	0.00	#VALUE!	0.00	#VALUE!	#VALUE!	#VALUE!	0.00	#VALUE!	0.00	#VALUE!	0.00	#VALUE!	0.00
%RSD				21.95	20.27	2.05	8.28	1.43	3.90	#VALUE!	6.71	#VALUE!	4.84	#VALUE!	10.97	0.99	3.18	1.54	3.25	4.54	3.54	12.96	9.34	14.31	3.23	4.20	3.63	1.39	3.17	16.20	10.19	15.43	5.05	#VALUE!	5.86	#VALUE!	10.35	#VALUE!	7.88	#VALUE!	#VALUE!	#VALUE!	3.07	#VALUE!	2.86	#VALUE!	2.86	#VALUE!	2.87
%RD				1009.77	#DIV/0!	0.55	#DIV/0!	8.00	#DIV/0!	#VALUE!	#DIV/0!	#VALUE!	#DIV/0!	#VALUE!	#DIV/0!	3.63	#DIV/0!	-10.08	#DIV/0!	126.20	#DIV/0!	#DIV/0!	#DIV/0!	#DIV/0!	#DIV/0!	8.14	#DIV/0!	414.80	#DIV/0!	#DIV/0!	#DIV/0!	#DIV/0!	#DIV/0!	#VALUE!	#DIV/0!	#VALUE!	#DIV/0!	#VALUE!	#DIV/0!	#VALUE!	#VALUE!	#VALUE!	#DIV/0!	#VALUE!	#DIV/0!	#VALUE!	#DIV/0!	#VALUE!	#DIV/0!
	JR-3	Govindaraju (1994)/Georem Compilation		0.05	-	12.10	-	72.48	-	0.01	-	39.00	-	-	-	4.33	-	0.09	-	0.21	-	-	-	2.50	-	0.09	-	4.75	-	1.00	-	1.10	-	2.10	-	204.00	-	0.72	-	1674.00	-	-	-	-	-	-	-	-	-
JR-3 Average (n=37)				7.08	0.96	12.59	0.17	80.60	0.13	0.08	0.01	#VALUE!	0.02	#VALUE!	0.18	4.49	0.01	#VALUE!	0.02	0.47	0.02	0.02	0.00	0.04	0.00	0.09	0.00	5.45	0.02	0.00	0.00	0.01	0.00	#VALUE!	0.00	0.04	0.00	#VALUE!	0.01	#VALUE!	#VALUE!	#VALUE!	0.01	#VALUE!	0.02	#VALUE!	0.03	#VALUE!	0.04
Stdev				1.76	0.20	0.30	0.01	1.33	0.00	0.01	0.00	#VALUE!	0.00	#VALUE!	0.02	0.05	0.00	#VALUE!	0.00	0.02	0.00	0.00	0.00	0.00	0.00	0.00	0.00	0.06	0.00	0.00	0.00	0.00	0.00	#VALUE!	0.00	0.00	0.00	#VALUE!	0.00	#VALUE!	#VALUE!	#VALUE!	0.00	#VALUE!	0.00	#VALUE!	0.00	#VALUE!	0.00
%RSD				24.89	20.80	2.35	7.99	1.65	3.39	11.65	4.83	#VALUE!	4.45	#VALUE!	11.10	1.19	3.36	#VALUE!	3.96	4.74	3.59	14.72	9.61	10.45	3.75	3.68	3.63	1.02	3.31	14.21	9.86	16.34	7.59	#VALUE!	75.63	8.93	9.05	#VALUE!	8.46	#VALUE!	#VALUE!	#VALUE!	3.05	#VALUE!	2.96	#VALUE!	2.88	#VALUE!	2.90
%RD				14052.35	#VALUE!	4.04	#VALUE!	11.21	#VALUE!	807.35	#VALUE!	#VALUE!	#VALUE!	#VALUE!	#VALUE!	3.72	#VALUE!	#VALUE!	#VALUE!	124.68	#VALUE!	#VALUE!	#VALUE!	-98.42	#VALUE!	6.60	#VALUE!	14.82	#VALUE!	-99.84	#VALUE!	-99.31	#VALUE!	#VALUE!	#VALUE!	-99.98	#VALUE!	#VALUE!	#VALUE!	#VALUE!	#VALUE!	#VALUE!	#VALUE!	#VALUE!	#VALUE!	#VALUE!	#VALUE!	#VALUE!	#VALUE!
	MRG-1	Govindaraju (1994)/Georem Compilation		13.55	-	8.47	-	39.12	-	0.08	-	610.00	-	170.00	-	0.18	-	14.70	-	3.77	-	526.00	-	430.00	-	0.17	-	17.94	-	87.00	-	193.00	-	134.00	-	191.00	-	0.73	-	108.00	-	0.87	-	0.11	-	0.17	-	3.60	-
MRG-1 Average (n=33)				12.83	1.55	8.09	0.18	41.89	0.12	#VALUE!	0.04	#VALUE!	0.01	#VALUE!	0.12	#VALUE!	0.01	14.21	0.01	3.72	0.04	0.04	0.00	0.06	0.00	0.14	0.00	17.38	0.03	0.01	0.00	0.02	0.00	0.01	0.00	0.03	0.00	#VALUE!	0.01	0.01	0.00	#VALUE!	0.00	#VALUE!	0.02	#VALUE!	0.02	#VALUE!	0.03
Stdev				2.87	0.33	0.24	0.01	0.65	0.00	#VALUE!	0.00	#VALUE!	0.00	#VALUE!	0.01	#VALUE!	0.00	0.29	0.00	0.08	0.00	0.00	0.00	0.00	0.00	0.00	0.00	0.19	0.00	0.00	0.00	0.00	0.00	0.00	0.00	0.00	0.00	#VALUE!	0.00	0.00	0.00	#VALUE!	0.00	#VALUE!	0.00	#VALUE!	0.00	#VALUE!	0.00
%RSD				22.38	21.56	2.91	3.87	1.55	2.76	#VALUE!	5.42	#VALUE!	4.05	#VALUE!	11.83	#VALUE!	3.66	2.07	3.92	2.08	3.27	10.24	9.19	7.37	3.81	3.42	3.92	1.08	3.36	7.89	10.24	15.23	6.52	8.05	6.16	9.30	9.65	#VALUE!	8.96	2.02	1.07	#VALUE!	41.46	#VALUE!	3.09	#VALUE!	3.21	#VALUE!	2.57
%RD				-5.35	#VALUE!	-4.49	#VALUE!	7.07	#VALUE!	#VALUE!	#VALUE!	#VALUE!	#VALUE!	#VALUE!	#VALUE!	#VALUE!	#VALUE!	-3.35	#VALUE!	-1.31	#VALUE!	-99.99	#VALUE!	-99.99	#VALUE!	-16.59	#VALUE!	-3.09	#VALUE!	-99.99	#VALUE!	-99.99	#VALUE!	-99.99	#VALUE!	-99.99	#VALUE!	#VALUE!	#VALUE!	-99.99	#VALUE!	#VALUE!	#VALUE!	#VALUE!	#VALUE!	#VALUE!	#VALUE!	#VALUE!	#VALUE!
	PER-1	Geolabs sheet		0.35	0.01	12.53	0.09	75.09	0.48	0.03	0.01	<0.01	-	-	-	4.37	0.01	1.18	0.01	0.15	0.01	19.00	1.00	-	-	0.04	0.01	-	-	2.00	1.00	<5	-	4.00	1.00	22.00	1.00	-	-	90.00	3.00	3.00	1.00	-	-	-	-	1.20	0.10
PER-1 Average (n=33)				8.37	0.98	13.10	0.18	88.19	0.15	#VALUE!	0.05	#VALUE!	0.02	#VALUE!	0.22	4.53	0.01	0.79	0.01	0.47	0.02	0.02	0.00	0.05	0.00	0.05	0.00	1.96	0.01	#VALUE!	0.00	0.01	0.00	#VALUE!	0.01	#VALUE!	0.01	#VALUE!	0.01	#VALUE!	#VALUE!	#VALUE!	0.01	#VALUE!	0.03	#VALUE!	0.03	#VALUE!	0.04
Stdev				1.83	0.20	0.36	0.01	1.47	0.01	#VALUE!	0.00	#VALUE!	0.00	#VALUE!	0.02	0.06	0.00	0.02	0.00	0.03	0.00	0.00	0.00	0.00	0.00	0.00	0.00	0.02	0.00	#VALUE!	0.00	0.00	0.00	#VALUE!	0.00	#VALUE!	0.00	#VALUE!	0.00	#VALUE!	#VALUE!	#VALUE!	0.00	#VALUE!	0.00	#VALUE!	0.00	#VALUE!	0.00
%RSD				21.85	20.72	2.74	6.32	1.66	8.23	#VALUE!	6.23	#VALUE!	4.47	#VALUE!	10.99	1.31	2.35	2.86	2.45	5.93	2.77	15.32	8.92	8.53	3.19	6.44	3.12	1.22	2.37	#VALUE!	190.35	22.30	3.48	#VALUE!	5.33	#VALUE!	9.28	#VALUE!	8.89	#VALUE!	#VALUE!	#VALUE!	1.76	#VALUE!	1.92	#VALUE!	1.95	#VALUE!	1.89
%RD				2291.65	9675.50	4.58	97.61	17.45	-69.41	#VALUE!	365.77	#VALUE!	#VALUE!	#VALUE!	#VALUE!	3.57	-15.09	-32.94	-40.42	215.80	141.67	-99.87	-99.74	#VALUE!	#VALUE!	30.74	-71.96	#VALUE!	#VALUE!	#VALUE!	-99.99	#VALUE!	#VALUE!	#VALUE!	-99.32	#VALUE!	-98.88	#VALUE!	#VALUE!	#VALUE!	#VALUE!	#VALUE!	-99.44	#VALUE!	#VALUE!	#VALUE!	#VALUE!	#VALUE!	-59.40
	QLO-1	USGS Sheet		1.00	0.07	16.20	0.19	65.60	0.47	0.25	0.02	30.00	-	220.00	18.00	3.60	0.12	3.17	0.08	0.62	0.03	54.00	6.00	3.20	1.70	-	-	4.35	0.14	7.20	0.50	-	-	29.00	3.00	61.00	3.00	3.50	-	185.00	16.00	2.60	0.30	0.06	0.01	-	-	2.30	0.09
QLO-1 Average (n=33)				6.66	1.01	16.15	0.18	71.16	0.13	0.12	0.01	#VALUE!	0.02	#VALUE!	0.21	3.51	0.01	2.94	0.01	1.00	0.03	0.04	0.00	0.03	0.00	0.09	0.00	4.66	0.02	0.00	0.00	0.01	0.00	0.00	0.00	#VALUE!	0.01	#VALUE!	0.01	#VALUE!	#VALUE!	#VALUE!	0.01	#VALUE!	0.03	#VALUE!	0.03	#VALUE!	0.04
Stdev				1.66	0.21	0.44	0.01	1.17	0.00	0.01	0.00	#VALUE!	0.00	#VALUE!	0.02	0.04	0.00	0.04	0.00	0.04	0.00	0.00	0.00	0.00	0.00	0.00	0.00	0.05	0.00	0.00	0.00	0.00	0.00	0.00	0.00	#VALUE!	0.00	#VALUE!	0.00	#VALUE!	#VALUE!	#VALUE!	0.00	#VALUE!	0.00	#VALUE!	0.00	#VALUE!	0.00
%RSD				24.98	20.65	2.72	5.12	1.65	3.09	9.29	4.50	#VALUE!	3.96	#VALUE!	10.88	1.08	2.30	1.23	2.38	3.57	2.80	12.52	8.77	11.90	2.84	3.62	2.53	1.15	2.40	10.44	10.45	14.48	1.45	10.22	4.46	#VALUE!	31.79	#VALUE!	8.77	#VALUE!	#VALUE!	#VALUE!	2.04	#VALUE!	1.87	#VALUE!	1.91	#VALUE!	1.97
%RD				565.94	1346.38	-0.29	-5.42	8.48	-72.50	-50.27	-50.51	#VALUE!	#VALUE!	#VALUE!	-98.83	-2.61	-93.98	-7.37	-91.23	61.00	-12.07	-99.93	-99.96	-98.96	-99.78	#VALUE!	#VALUE!	7.21	-88.51	-99.98	-99.98	#VALUE!	#VALUE!	-99.99	-99.98	#VALUE!	-99.60	#VALUE!	#VALUE!	#VALUE!	#VALUE!	#VALUE!	-98.23	#VALUE!	411.88	#VALUE!	#VALUE!	#VALUE!	-58.10
	SCo-1	Govindaraju (1994)/Georem Compilation		2.72		13.67		62.78		0.21		630.00		51.00		2.77		2.62		0.63		131.00		68.00		0.05		4.19		10.50		27.00		28.70		103.00		12.40		160.00		1.37		0.13		0.14		3.70
Mean				7.49	1.04	15.37	0.18	64.18	0.12	0.10	0.01	#VALUE!	0.02	#VALUE!	0.20	2.59	0.01	2.45	0.01	0.85	0.02	0.03	0.00	0.03	0.00	0.06	0.00	5.55	0.02	0.00	0.00	0.01	0.00	0.00	0.00	0.01	0.00	#VALUE!	0.01	#VALUE!	#VALUE!	#VALUE!	0.01	#VALUE!	0.02	#VALUE!	0.03	#VALUE!	0.04
Stdev				1.52	0.22	0.36	0.01	1.02	0.00	0.01	0.00	#VALUE!	0.00	#VALUE!	0.02	0.03	0.00	0.04	0.00	0.03	0.00	0.00	0.00	0.00	0.00	0.00	0.00	0.05	0.00	0.00	0.00	0.00	0.00	0.00	0.00	0.00	0.00	#VALUE!	0.00	#VALUE!	#VALUE!	#VALUE!	0.00	#VALUE!	0.00	#VALUE!	0.00	#VALUE!	0.00
%RSD				20.30	20.91	2.34	5.08	1.59	3.04	8.76	4.20	#VALUE!	3.56	#VALUE!	11.69	1.33	2.37	1.62	2.44	3.27	2.60	10.63	8.62	11.36	3.13	6.43	3.11	0.91	2.21	11.53	10.10	17.90	4.04	14.45	7.33	10.49	9.19	#VALUE!	8.59	#VALUE!	#VALUE!	#VALUE!	2.02	#VALUE!	1.89	#VALUE!	1.89	#VALUE!	1.97
%RD				175.48	#DIV/0!	12.41	#DIV/0!	2.23	#DIV/0!	-50.89	#DIV/0!	#VALUE!	#DIV/0!	#VALUE!	#DIV/0!	-6.59	#DIV/0!	-6.65	#DIV/0!	35.63	#DIV/0!	-99.98	#DIV/0!	-99.95	#DIV/0!	4.31	#DIV/0!	32.37	#DIV/0!	-99.98	#DIV/0!	-99.97	#DIV/0!	-99.99	#DIV/0!	-99.99	#DIV/0!	#VALUE!	#DIV/0!	#VALUE!	#VALUE!	#VALUE!	#DIV/0!	#VALUE!	#DIV/0!	#VALUE!	#DIV/0!	#VALUE!	#DIV/0!
	SDC-1	USGS Sheet		1.69	0.10	15.80	0.34	65.80	0.43	0.16	0.03	-	-	32.00	-	3.28	0.10	1.40	0.07	1.01	0.04	102.00	12.00	64.00	7.00	-	-	6.32	0.23	18.00	1.00	38.00	-	30.00	3.00	103.00	8.00	0.22	0.01	290.00	30.00	-	-	-	-	-	-	3.00	0.20
SDC-1 Average (n=33)				8.17	0.99	16.00	0.18	73.06	0.13	0.08	0.01	#VALUE!	0.02	#VALUE!	0.18	3.16	0.01	0.98	0.01	1.32	0.03	0.03	0.00	0.04	0.00	0.10	0.00	7.06	0.02	0.00	0.00	0.01	0.00	0.00	0.00	0.01	0.00	#VALUE!	0.01	#VALUE!	#VALUE!	#VALUE!	0.01	#VALUE!	0.02	#VALUE!	0.03	#VALUE!	0.03
Stdev				1.88	0.21	0.39	0.01	0.89	0.00	0.01	0.00	#VALUE!	0.00	#VALUE!	0.02	0.04	0.00	0.03	0.00	0.02	0.00	0.00	0.00	0.00	0.00	0.00	0.00	0.08	0.00	0.00	0.00	0.00	0.00	0.00	0.00	0.00	0.00	#VALUE!	0.00	#VALUE!	#VALUE!	#VALUE!	0.00	#VALUE!	0.00	#VALUE!	0.00	#VALUE!	0.00
%RSD				22.95	21.12	2.43	5.08	1.22	3.28	11.94	4.58	#VALUE!	3.88	#VALUE!	11.41	1.33	2.55	2.59	2.44	1.78	2.49	9.85	8.70	11.24	2.42	4.30	2.78	1.11	2.54	12.89	10.51	12.72	4.12	14.11	4.54	11.03	9.19	#VALUE!	8.51	#VALUE!	#VALUE!	#VALUE!	2.31	#VALUE!	1.98	#VALUE!	2.05	#VALUE!	2.00
%RD				383.54	889.36	1.25	-47.28	11.03	-69.68	-50.42	-63.48	#VALUE!	#VALUE!	#VALUE!	#VALUE!	-3.72	-93.07	-29.81	-92.28	30.28	-32.75	-99.97	-99.98	-99.94	-99.95	#VALUE!	#VALUE!	11.68	-91.70	-99.99	-99.99	-99.98	#VALUE!	-99.99	-99.98	-99.99	-99.99	#VALUE!	-15.85	#VALUE!	#VALUE!	#VALUE!	#VALUE!	#VALUE!	#VALUE!	#VALUE!	#VALUE!	#VALUE!	-82.60
	SDo-1	Govindaraju (1994)/Georem Compilation		1.54		12.27		49.28		0.11		5.35		190.00		3.35		1.05		0.71		160.00		66.40		0.04		9.34		46.80		99.50		60.20		64.10		68.50		165.00		134.00						2.90
Sdo-1 Average (n=33)				5.53	1.31	13.98	0.18	52.73	0.11	#VALUE!	0.03	4.29	0.01	#VALUE!	0.16	3.50	0.01	0.45	0.00	0.88	0.02	0.02	0.00	0.02	0.00	0.04	0.00	9.70	0.02	0.00	0.00	0.01	0.00	0.01	0.00	#VALUE!	0.01	0.01	0.00	#VALUE!	#VALUE!	0.01	0.00	#VALUE!	0.02	#VALUE!	0.03	#VALUE!	0.03
Stdev				1.39	0.27	0.33	0.01	0.82	0.00	#VALUE!	0.02	0.07	0.00	#VALUE!	0.02	0.05	0.00	0.01	0.00	0.03	0.00	0.00	0.00	0.00	0.00	0.00	0.00	0.10	0.00	0.00	0.00	0.00	0.00	0.00	0.00	#VALUE!	0.00	0.00	0.00	#VALUE!	#VALUE!	0.00	0.00	#VALUE!	0.00	#VALUE!	0.00	#VALUE!	0.00
%RSD				25.15	20.60	2.37	5.12	1.55	3.08	#VALUE!	54.97	1.73	2.96	#VALUE!	11.55	1.32	2.37	3.30	2.28	3.10	2.66	11.80	8.51	13.98	2.90	6.63	3.23	1.00	2.37	9.22	10.26	16.75	3.11	9.20	4.46	#VALUE!	26.05	8.78	8.41	#VALUE!	#VALUE!	1.52	0.00	#VALUE!	1.86	#VALUE!	1.89	#VALUE!	1.90
%RD				259.03	#DIV/0!	13.95	#DIV/0!	7.00	#DIV/0!	#VALUE!	#DIV/0!	-19.83	#DIV/0!	#VALUE!	#DIV/0!	4.37	#DIV/0!	-56.88	#DIV/0!	24.09	#DIV/0!	-99.99	#DIV/0!	-99.96	#DIV/0!	1.62	#DIV/0!	3.89	#DIV/0!	-99.99	#DIV/0!	-99.99	#DIV/0!	-99.99	#DIV/0!	#VALUE!	#DIV/0!	-99.98	#DIV/0!	#VALUE!	#VALUE!	-99.99	#DIV/0!	#VALUE!	#DIV/0!	#VALUE!	#DIV/0!	#VALUE!	#DIV/0!
	SGR-1	Govindaraju (1994)/Georem Compilation		4.44		6.52		28.24		0.33		1.53		32.00		1.66		8.38		0.26		128.00		30.00		0.03		1.46		11.80		29.00		66.00		74.00		67.00		53.00		35.10				0.93		1.90
SGR-1 Average (n=33)				4.38	1.22	6.97	0.14	33.48	0.09	0.28	0.01	1.33	0.00	#VALUE!	0.22	1.87	0.00	10.85	0.01	0.46	0.02	0.02	0.00	0.02	0.00	0.04	0.00	3.70	0.01	0.00	0.00	0.01	0.00	0.01	0.00	0.01	0.00	0.01	0.00	#VALUE!	#VALUE!	0.00	0.00	#VALUE!	0.03	#VALUE!	0.03	#VALUE!	0.04
Stdev				1.19	0.25	0.16	0.01	0.51	0.00	0.01	0.00	0.02	0.00	#VALUE!	0.03	0.02	0.00	0.10	0.00	0.02	0.00	0.00	0.00	0.00	0.00	0.00	0.00	0.04	0.00	0.00	0.00	0.00	0.00	0.00	0.00	0.00	0.00	0.00	0.00	#VALUE!	#VALUE!	0.00	0.00	#VALUE!	0.00	#VALUE!	0.00	#VALUE!	0.00
%RSD				27.28	20.85	2.32	3.92	1.52	3.04	4.10	4.30	1.73	2.69	#VALUE!	11.74	1.13	2.13	0.96	2.07	4.58	2.42	14.72	8.75	20.78	3.10	5.63	2.96	0.98	2.13	8.30	10.47	13.85	3.49	6.58	4.54	10.74	9.19	8.67	7.87	#VALUE!	#VALUE!	11.17	0.00	#VALUE!	1.82	#VALUE!	1.81	#VALUE!	1.81
%RD				-1.44	#DIV/0!	6.87	#DIV/0!	18.57	#DIV/0!	-13.67	#DIV/0!	-12.82	#DIV/0!	#VALUE!	#DIV/0!	12.40	#DIV/0!	29.45	#DIV/0!	72.76	#DIV/0!	-99.99	#DIV/0!	-99.94	#DIV/0!	16.52	#DIV/0!	153.34	#DIV/0!	-99.99	#DIV/0!	-99.98	#DIV/0!	-99.99	#DIV/0!	-99.98	#DIV/0!	-99.98	#DIV/0!	#VALUE!	#VALUE!	-100.00	#DIV/0!	#VALUE!	#DIV/0!	#VALUE!	#DIV/0!	#VALUE!	#DIV/0!
	W-2	GeoRem Recommended		6.37	0.06	15.45	0.16	52.68	0.29	0.13	0.03	79.00	-	190.00	-	0.63	0.01	10.86	0.08	1.06	0.01	268.00	10.00	93.00	6.00	0.17	0.01	10.83	0.21	45.00	2.00	72.00	4.00	105.00	3.00	77.00	6.00	1.10	0.10	92.00	4.00	0.44	-	0.05	-	0.08	-	2.00	0.01
W-2A Average (n=33)				9.03	1.17	17.21	0.18	55.43	0.12	0.07	0.01	#VALUE!	0.01	#VALUE!	0.16	0.29	0.00	10.35	0.01	1.30	0.03	0.03	0.00	0.03	0.00	0.14	0.00	10.58	0.02	0.00	0.00	0.01	0.00	0.01	0.00	#VALUE!	0.01	#VALUE!	0.01	#VALUE!	#VALUE!	#VALUE!	0.00	#VALUE!	0.02	#VALUE!	0.03	#VALUE!	0.03
Stdev				2.53	0.24	0.47	0.01	1.06	0.00	0.01	0.00	#VALUE!	0.00	#VALUE!	0.02	0.01	0.00	0.12	0.00	0.04	0.00	0.00	0.00	0.00	0.00	0.01	0.00	0.10	0.00	0.00	0.00	0.00	0.00	0.00	0.00	#VALUE!	0.01	#VALUE!	0.00	#VALUE!	#VALUE!	#VALUE!	0.00	#VALUE!	0.00	#VALUE!	0.00	#VALUE!	0.00
%RSD				28.07	20.69	2.71	5.12	1.91	3.16	17.71	4.48	#VALUE!	3.59	#VALUE!	11.18	3.27	2.60	1.19	2.43	2.95	2.68	12.78	8.84	12.50	3.54	3.62	2.72	0.97	2.23	7.61	9.46	13.55	6.40	7.43	4.46	#VALUE!	94.25	#VALUE!	9.24	#VALUE!	#VALUE!	#VALUE!	2.16	#VALUE!	1.91	#VALUE!	1.91	#VALUE!	1.87
%RD				41.71	1921.40	11.42	12.31	5.21	-58.78	-43.53	-61.45	#VALUE!	#VALUE!	#VALUE!	#VALUE!	-54.16	-67.76	-4.72	-87.38	22.86	169.94	-99.99	-99.98	-99.96	-99.94	-16.39	-36.16	-2.27	-88.45	-99.99	-99.99	-99.99	-99.97	-99.99	-99.98	#VALUE!	-99.89	#VALUE!	-93.05	#VALUE!	#VALUE!	#VALUE!	#VALUE!	#VALUE!	#VALUE!	#VALUE!	#VALUE!	#VALUE!	232.27
[truncated: 10 more columns]
